1 *Research Article*

2 **Correlation between increased atrial expression of genes related to fatty acid**  
3 **metabolism and autophagy in patients with chronic atrial fibrillation**

4

5 Yasushige Shingu<sup>1</sup>, Shingo Takada<sup>2</sup>, Takashi Yokota<sup>2,\*</sup>, Ryosuke Shirakawa<sup>2</sup>, Akira  
6 Yamada<sup>3</sup>, Tomonori Ooka<sup>1</sup>, Hiroki Katoh<sup>4</sup>, Suguru Kubota<sup>1</sup>, and Yoshiro Matsui<sup>1</sup>

7

8 <sup>1</sup>Department of Cardiovascular and Thoracic Surgery, Faculty of Medicine and  
9 Graduate School of Medicine, Hokkaido University, Sapporo, Japan; <sup>2</sup>Department of  
10 Cardiovascular Medicine, Faculty of Medicine and Graduate School of Medicine,  
11 Hokkaido University, Sapporo, Japan; <sup>3</sup>Department of Cardiovascular Surgery, Teine  
12 Keijinkai Hospital, Sapporo, Japan; <sup>4</sup>Emergency and Critical Care Center, Hokkaido  
13 University Hospital, Sapporo, Japan

14

15 **\*Corresponding author:** Dr. Takashi Yokota, Clinical Research and Medical  
16 Innovation Center, Hokkaido University Hospital, Kita-14, Nishi-5, Kita-Ku, Sapporo  
17 060-8648, Japan. Tel: +81-11-706-6001; Fax: +81-11-706-7613. Email:

18 [t-yokota@med.hokudai.ac.jp](mailto:t-yokota@med.hokudai.ac.jp)

19

20 **Word count:** 3,373 words, **Number of Tables and Figures:** 9

21 **Short title:** Fatty acid metabolism & autophagy in AF

22 **Grants:** This study was supported by KAKENHI Grant-in-Aid for Young Scientists (B)  
23 (#JP24791453 to Y.S.), the Cardiovascular Research Fund (to Y.S.), and the Center of  
24 Innovation Program from the Japan Science and Technology Agency (#JPMJCE1301 to  
25 T.Y.).

26

## 27 **Abstract**

28           Atrial metabolic disturbance contributes to the onset and development of atrial  
29 fibrillation (AF). Autophagy plays a role in maintaining the cellular energy balance. We  
30 examined whether the altered atrial expression of genes related to fatty acid metabolism  
31 is linked to that related to autophagy in chronic AF. Right atrial tissue was obtained  
32 during heart surgery from 51 patients with sinus rhythm (SR, n=38) or chronic AF  
33 (n=13). Preoperative fasting serum free-fatty-acid levels were significantly higher in the  
34 AF patients. The atrial gene expression of fatty acid binding protein 3 (*FABP3*), which  
35 is involved in the cells' fatty acid uptake and intracellular fatty acid transport, was  
36 significantly increased in AF patients compared to SR patients; in the SR patients it was  
37 positively correlated with the right atrial diameter and intra-atrial EMD, parameters of  
38 structural and electrical atrial remodeling that was evaluated by an echocardiography. In  
39 contrast, the two groups' atrial contents of diacylglycerol (DAG), a toxic fatty acid  
40 metabolite, were comparable. Importantly, the atrial gene expression of  
41 microtubule-associated protein light chain 3 (*LC3*) was significantly increased in the AF  
42 patients, and autophagy-related genes including *LC3* were positively correlated with the  
43 atrial expression of *FABP3*. In conclusion, in chronic AF patients, the atrial expression  
44 of *FABP3* was upregulated in association with autophagy-related genes without altered  
45 atrial DAG content. Our findings may support the hypothesis that dysregulated cardiac  
46 fatty acid metabolism contributes to the progression of AF and induction of autophagy  
47 has a cardioprotective effect against cardiac lipotoxicity in chronic AF.

48

49 **Key words:** atrial fibrillation; atrial remodeling; autophagy; fatty acid metabolism;  
50 lipotoxicity

51

## 52 **Introduction**

53           Atrial fibrillation (AF) is the most common cardiac arrhythmia, and its presence  
54 is associated with increased risks of death, heart failure, and stroke [1-3]. With the  
55 current increased prevalence of AF, the prevention of AF is important not only for  
56 public health but also to reduce the associated economic burden [4]. The risk factors for  
57 AF are diverse, including higher serum levels of free fatty acids (FFAs), obesity,  
58 hypertension, inflammation, and oxidative stress [5-7]. The mechanisms underlying the  
59 onset and development of AF have not been fully elucidated.

60           The pathophysiology of AF is complex and involves electrical, structural,  
61 contractile, and neurohormonal remodeling [8, 9]; metabolic disturbance in the atrial  
62 cardiac muscle is a recent focus of AF research, as the heart has a very high energy  
63 demand due to its organ-specific feature involving the constant activation of  
64 mitochondrial oxidative phosphorylation. In particular, fatty acids are the major fuel for  
65 the heart; their use depends on their uptake into the cells, transport from the cytosol into  
66 the mitochondria, and  $\beta$ -oxidation in the mitochondria. Prior research has shown that an  
67 elevated level of circulating FFAs is a strong risk factor for AF and AF-related  
68 stroke [6, 10] and can be a trigger of cardiac lipotoxicity, which is defined as the excess  
69 accumulation of toxic fatty acid metabolites such as diacylglycerol (DAG) in the heart.  
70 This may occur when the influx of FFAs exceeds the intracellular fatty acid oxidation,

71 which leads to cardiac dysfunction, cardiac remodeling, and arrhythmias [11]. However,  
72 it is still unclear how metabolic disturbances including abnormal fatty acid metabolism  
73 contribute to the development of AF.

74 Autophagy, the process of the degradation of intracellular components (e.g.,  
75 proteins) in lysosomes, plays an important role in cellular homeostasis via cellular  
76 quality control. Autophagy was also shown to contribute to the cellular energy balance,  
77 in particular through a mechanism of fatty acid metabolism termed "lipophagy" (the  
78 degradation of excess lipids by autophagy) and the degradation of lipid stores in the  
79 cells [12]. Accordingly, autophagy may regulate the fatty acid metabolism in  
80 cardiomyocytes. Alterations of the autophagy in the atrial muscles of patients with  
81 persistent AF [13, 14] or post-operative AF have been reported [15]. Although it is still  
82 controversial whether the induction of autophagy has a cardioprotective or detrimental  
83 effect in AF, it is possible that autophagy is involved in metabolic remodeling in the  
84 atrium in chronic AF patients.

85 We conducted the present study to determine: (1) whether the expression of  
86 genes related to fatty acid metabolism and autophagy are altered in the atria of patients  
87 with chronic AF, and (2) whether changes in these gene expression patterns are  
88 correlated with each other. We used human atrial tissue excised from patients during

89 cardiac surgery, and our findings provide new insight into the pathophysiology of AF,

90 focusing on fatty acid metabolism and autophagy in the human atrium.

91

92

## 93 **Materials and Methods**

### 94 **Patients**

95           This study was conducted at Hokkaido University Hospital and Teine Keijinkai  
96 Hospital and included 51 consecutive patients: 38 with sinus rhythm (SR) and 13 with  
97 chronic AF who underwent cardiovascular surgery between 2013 and 2019 at either of  
98 these hospitals. All of the patients were Japanese. The patients with SR in the present  
99 series partly overlap with those of our recently published report [16].

100           After the establishment of a cardiopulmonary bypass (10 min after the infusion of  
101 heparin 300 IU/kg), right atrial myocardial tissue (approx. 100 mm<sup>2</sup>) was excised from  
102 the right atrial incision site or the insertion point of a drainage cannula. The tissue was  
103 frozen and stored at -80°C until analysis.

104           Type 2 diabetes was defined as a fasting glucose level  $\geq 7.0$  mmol/L and/or taking  
105 antidiabetes medications. Coronary artery disease was evaluated by coronary  
106 angiography, and stenosis  $\geq 75\%$  was defined as significant; a patient with a history of  
107 percutaneous coronary intervention was also regarded as having coronary artery disease.

108           The study protocol was approved by the Ethics Committees of Hokkaido  
109 University Hospital and Teine Keijinkai Hospital and performed according to the  
110 Declaration of Helsinki. Written informed consent was obtained from each patient

111 before the surgery. This study was registered in the UMIN Clinical Trials Registry:  
112 UMIN000012405 and UMIN000018137.

113

## 114 **Transthoracic echocardiography**

115 A Vivid Seven system (GE/Vingmed, Milwaukee, WI, USA) with an M3S (2.5–  
116 3.5 MHz) transducer, an Aplio system (Toshiba Medical Systems, Tokyo) with a  
117 2.5-MHz transducer, or a Philips system (Philips Ultrasound, Bothell, WA) with a  
118 2.5-MHz transducer was used for the pre-operative echocardiography. The left  
119 ventricular and atrial diameters were measured from the parasternal long-axis view. The  
120 right atrial diameter (the largest minor-axis diameter in the four-chamber view) was  
121 obtained at end-systole [17].

122 The electromechanical delay (EMD) of the right atrium was assessed in all but  
123 one of the SR patients as a time interval (T1) from the beginning of the P-wave on  
124 surface ECG to the beginning of the late diastolic wave (A') of the tricuspid annulus  
125 [17]. T2 was the time interval from the beginning of the P-wave on the surface ECG to  
126 the A' of the septal mitral annulus. The intra-atrial EMD was the interval from T1 to T2,  
127 expressed as T2-T1 (msec). The left ventricular ejection fraction (LVEF) was measured  
128 using the biplane method of disks. The mitral regurgitation grade was defined by the

129 regurgitation jet area-to-left atrium ratio (mild, <20%; moderate, 20%–40%; severe,  
130 >40%).

131 Tricuspid regurgitation was graded using the regurgitation jet area (mild, <5 cm<sup>2</sup>;  
132 moderate, 5–10 cm<sup>2</sup>; severe, >10 cm<sup>2</sup>). Aortic stenosis was defined using the valve area  
133 (mild, >1.5 cm<sup>2</sup>; moderate, 1.0–1.5 cm<sup>2</sup>; severe, <1.0 cm<sup>2</sup>). Aortic regurgitation was  
134 determined using a combination of the jet width/outflow tract, the pressure half-time,  
135 and the diastolic reverse flow at the abdominal aorta (mild, moderate, severe) [18].

136

## 137 **Blood biochemistry**

138 Blood was collected from each patient early in the morning after a 10-hr fast  
139 within 2 days before surgery. The blood glucose, hemoglobin A1c, insulin, and FFA  
140 levels were measured by an enzymatic reaction involving glucose oxidase,  
141 high-performance liquid chromatography, an enzyme immunoassay, and the enzymatic  
142 method, respectively. Total cholesterol and triglycerides were assessed by enzymatic  
143 methods. The plasma levels of B-type natriuretic peptide (BNP) were evaluated by a  
144 chemiluminescent enzyme immunoassay.

145

## 146 **The atrial expression of genes related to fatty acid metabolism** 147 **and autophagy**



148           The atrial expression of the following genes related to fatty acid metabolism and  
149 autophagy was determined by reverse transcription-polymerase chain reaction  
150 (RT-PCR): cluster of differentiation 36/fatty acid translocase (*CD36*), carnitine  
151 palmitoyltransferase 1B (*CPT1B*), fatty acid-binding protein 3 (*FABP3*),  
152 autophagy-related gene 5 (*ATG5*), Unc-51-like kinase 1 (*ULK1*), Beclin-1 (*BCLN1*),  
153 and microtubule-associated protein light chain 3 (*LC3*). Myocardial mRNA was isolated  
154 from frozen tissue using a High Pure RNA Tissue Kit (Roche, Penzberg, Germany) and  
155 was then reverse-transcribed into cDNA using a Transcriptor First Strand cDNA  
156 Synthesis Kit (Roche).

157           The RT-PCR was performed using FastStart Essential DNA Probes Master  
158 (Roche) and the Real-time Ready Assay (Roche Assay ID: *CD36*, 144833; *CPT1B*,  
159 126501; *FABP3*, 118811; *ATG5*, 125999; *ULK1*, 109914; *BCLN1*, 100115; *LC3*,  
160 144582; *TBP*, 143707). PCR amplification was then performed with a reaction volume  
161 of 20  $\mu$ L using a LightCycler Nano (Roche) under the conditions specified by the  
162 manufacturer. After the initial denaturation and activation of the enzyme for 10 min at  
163 95°C, 45 cycles of denaturation at 95°C for 10 sec, and annealing and extension at 60°C  
164 for 30 sec were performed. *TBP* (TATA-binding protein) was used as a reference gene,  
165 as we confirmed that TBP is not influenced by the occurrence of AF.

166

## 167 **The atrial enzymatic activities of the mitochondrial TCA cycle** 168 **and fatty acid $\beta$ -oxidation**

169 We spectrophotometrically determined the activity levels of both citrate synthase  
170 (CS), a key enzyme in the tricarboxylic acid (TCA) cycle, and  $\beta$ -hydroxyacyl CoA  
171 dehydrogenase ( $\beta$ -HAD), a key enzyme in fatty acid  $\beta$ -oxidation, in the myocardial  
172 samples as described [19]. Due to the lack of atrial muscle samples, these enzymatic  
173 activities were measured in 20 of the 38 patients with SR and eight of the 13 patients  
174 with AF.

175

## 176 **The atrial DAG content**

177 Heart tissue was homogenized in 1.5 mL of methanol, followed by mixing with  
178 2.25 mL of 1 M NaCl and 2.5 mL of chloroform. The mixture was centrifuged at 1,500  
179 g for 10 min at 4°C, and the organic phase was dried. DAG was then detected with a  
180 DAG assay kit (Cell Biolabs, San Diego, CA) following the manufacturer's instructions.  
181 Due to the lack of atrial muscle samples, the atrial DAG content was measured in six  
182 patients with SR and six patients with AF.

183

## 184 **Statistical analyses**

185 Values are presented as the mean  $\pm$  standard deviation (SD) or the median  
186 (interquartile range [IQR]) as appropriate. We used Student's t-test for continuous  
187 variables that are normally distributed and the Mann-Whitney U-test for other  
188 continuous variables. The chi-square test or Fisher's exact test were used for categorical  
189 variables. We conducted a Pearson's correlation analysis to determine linear  
190 relationships between continuous variables. The statistical analyses were performed  
191 using GraphPad Prism ver. 8 (GraphPad Software, San Diego, CA), and significance  
192 was defined as  $p < 0.05$ .

193

194

## 195 **Results**

### 196 **Patient characteristics**

197           The characteristics of the SR and AF patients are summarized in **Table 1**. The  
198 median duration of AF was 12 years (range 1–16 years). Except for the use of  
199 medications, all parameters including cardiovascular risk factors were comparable  
200 between the two groups. The surgical procedures performed after the excision of atrial  
201 specimens included aortic valve replacement in 30 cases, total arch replacement in eight  
202 cases, coronary artery bypass grafting in 10 cases, aortic root replacement in six cases,  
203 and mitral valve repair in 12 cases. Multiple procedures were performed in some  
204 patients.

205

### 206 **Transthoracic echocardiography**

207           As shown in **Table 2**, the diameters of the left and the right atria were  
208 significantly increased in the AF group. The left ventricular size (i.e., left ventricular  
209 end-diastolic diameter [LVDd]) and the left ventricular systolic function (i.e., the  
210 LVEF) were comparable between the two groups. Regarding valvular heart disease, the  
211 grade of mitral regurgitation was higher in the AF group than in the SR group.

212

### 213 **The serum levels of FFA and the atrial expression of genes**

## 214 **related to fatty acid metabolism**

215 The serum FFA levels were significantly higher in the AF group compared to the  
216 SR group ( $719 \pm 107$  vs.  $416 \pm 37$   $\mu\text{mol/L}$ ,  $p=0.001$ , **Fig 1**).

217 The expressions of genes related to fatty acid metabolism in the right atrial  
218 muscle are shown in **Fig 2**. The gene expression of *CD36*, which facilitates fatty acid  
219 uptake across the plasma membrane, tended to be higher in the AF group than in the SR  
220 group (**Fig 2A**). The gene expression of *FABP3*, which facilitates fatty acid uptake into  
221 the cell and intracellular fatty acid transport, was significantly increased in the AF group  
222 (**Fig 2B**), but there was no significant difference between the two groups in the atrial  
223 expression of *CPT1B*, which is located on the outer mitochondrial membrane for fatty  
224 acid transport into the mitochondria (**Fig 2C**).

225 In the SR patients, *FABP3* gene was positively correlated with the right atrial  
226 diameter (**Fig 3A**) and the intra-atrial EMD (**Fig 3B**), indicating that increased atrial  
227 gene expression related to intracellular fatty acid transport was associated with  
228 structural and electrical atrial remodeling.

229

## 230 **The atrial enzymatic activities of the mitochondrial TCA cycle** 231 **and fatty acid $\beta$ -oxidation**

232 **Fig 4** illustrates the enzymatic activities related to the mitochondrial fatty acid

233  $\beta$ -oxidation and TCA cycle in the right atrial muscle. The CS activity was comparable  
234 between the SR and AF groups (**Fig 4A**), as was the  $\beta$ -HAD activity (**Fig 4B**).

235

## 236 **The atrial DAG content**

237 Despite the higher serum levels of FFA and the upregulated atrial gene  
238 expression of *FABP3* in the AF group, there was no significant difference in the atrial  
239 content of DAG, a major toxic fatty acid metabolite, between the SR and AF groups  
240 (**Fig 5**).

241

## 242 **The atrial expression of autophagy-related genes**

243 The gene expression of *LC3* in the right atrial muscle was significantly higher in  
244 the AF group than in the SR group (**Fig 6D**), but there was no significant difference in  
245 other autophagy-related genes including *ATG5*, *ULK1*, and *BCLN1* between the SR and  
246 AF groups (**Figs 6A–6C**).

247

## 248 **The linear relationship between the atrial expression of** 249 ***FABP3* gene and autophagy-related genes**

250 The gene expression of *FABP3* was positively correlated with autophagy-related  
251 genes including *LC3* gene in all patients (**Fig 7**). Similar correlations were observed

252 between *FABP3* gene and autophagy-related genes even when they were analyzed  
253 separately for the SR group (*FABP3* and *ATG5*:  $r^2=0.510$ ,  $p<0.001$ ; *FABP3* and *ULK1*:  
254  $r^2=0.622$ ,  $p<0.001$ ; *FABP3* and *BCLN1*:  $r^2=0.740$ ,  $p<0.001$ ; *FABP3* and *LC3*:  $r^2=0.384$ ,  
255  $p<0.001$ ) and the AF group (*FABP3* and *ATG5*:  $r^2=0.670$ ,  $p<0.001$ ; *FABP3* and *ULK1*:  
256  $r^2=0.790$ ,  $p<0.001$ ; *FABP3* and *BCLN1*:  $r^2=0.768$ ,  $p<0.001$ ; *FABP3* and *LC3*:  $r^2=0.534$ ,  
257  $p=0.005$ ).

258

259

## 260 **Discussion**

261           Our findings demonstrated that the atrial expression of a gene involved in fatty  
262 acid metabolism, *FABP3*, was upregulated in patients with chronic AF compared to the  
263 SR patients. In the SR patients, the increased atrial expression of *FABP3* was positively  
264 correlated with the right atrial diameter and the intra-atrial EMD, which are parameters  
265 of structural and electrical remodeling of the atrium. In contrast, there was no increase  
266 in the atrial content of DAG despite the increased atrial expression of *FABP3* and higher  
267 serum levels of FFA in our patients with chronic AF. Intriguingly, the atrial expression  
268 of a gene related to autophagosome maturation, *LC3*, was increased in the chronic AF  
269 patients, and autophagy-related genes including *LC3* were positively correlated with the  
270 atrial expression of *FABP3*. To the best of our knowledge, this is the first study showing  
271 that the atrial expression of *FABP3* gene is increased in association with  
272 autophagy-related genes in patients with chronic AF.

273

### 274 **The dysregulated fatty acid metabolism in the atrium of** 275 **chronic AF patients**

276           Compared to the SR patients, the chronic AF patients had higher serum FFA  
277 levels. The Cardiovascular Health Study has reported that an increase in the plasma  
278 levels of FFA by 200  $\mu\text{mol/L}$  presents an 11% higher risk of AF occurrence even after



279 adjustment for confounding risk factors including age, sex, race, physical activity, body  
280 mass index, coronary heart disease, congestive heart failure, smoking, alcohol use,  
281 log-C-reactive protein, diabetes mellitus, and hypertension in older adults [6].

282 Accordingly, elevated FFA levels can be an independent risk factor of AF.

283         The fatty acid-binding proteins (FABPs) reversibly bind to fatty acid and other  
284 lipophilic molecules. FABPs, which are located on the plasma membrane, facilitate  
285 fatty acid uptake into the cells, and intracellular FABPs transport fatty acid to other  
286 locations such as the nucleus and mitochondrion. Among the 10 isoforms of FABPs  
287 distributed in various tissues in mammals, FABP3 is most predominantly expressed in  
288 the heart [20]. Here, we observed that the gene expression of *FABP3* in the right atrial  
289 muscle was enhanced in chronic AF patients, which may indicate increased fatty acid  
290 uptake into the cells and increased intracellular fatty acid transport in the atrial muscle  
291 in chronic AF. In contrast, the gene expression of *CPT-1B* (which facilitates fatty acid  
292 transport across the outer mitochondrial membrane) and  $\beta$ -HAD activity (an enzymatic  
293 activity of mitochondrial fatty acid  $\beta$ -oxidation) in the atrium were comparable between  
294 our AF and SR groups.

295

296 **The association of the atrial expression of FABP3 with**  
297 **structural and electrical atrial remodeling**

298           The results of our analyses revealed that the expression of *FABP3* in the right  
299   atrial muscle was positively correlated with the right atrium diameter and the intra-atrial  
300   EMD in the SR patients. The intra-atrial EMD is the time delay from the electrical  
301   activation to the actual motion of the atrial myocardium, and a delayed intra-atrial EMD  
302   indicates excitation-contraction uncoupling in the atrium. Prolonged intra-atrial EMD  
303   after cardioversion was reported to predict AF recurrence in patients with persistent AF,  
304   and histopathological changes characterized by myocardial fibrosis in the atrium appear  
305   to be a major determinant of the prolonged intra-atrial EMD [21].

306           Boldt et al. revealed that the atrial expression of collagen type I is enhanced in  
307   patients with lone AF, indicating that the occurrence of AF can directly increase the  
308   expression of collagen type I and cause myocardial fibrosis in the atrial muscle [22].  
309   Although we did not conduct histopathological evaluations, previous reports and our  
310   present findings raise the possibility that the dysregulation of atrial fatty acid  
311   metabolism is linked to structural and electrical atrial remodeling, which may contribute  
312   to a future onset or recurrence of AF.

313

### 314   **Altered autophagy in the atrium in chronic AF**

315           Garcia et al. first reported impaired cardiac autophagy characterized by reduced  
316   LC3 processing (i.e., a reduced protein expression of LC3B II ) with an accumulation of

317 lipofuscin deposit — a potential trigger of AF — in the atrial myocardium in patients  
318 with post-operative AF [15]. A pair of studies have shown that in chronic AF patients,  
319 the cardiac autophagy characterized by an increased protein expression of LC3B II is  
320 induced in the atrial myocardium in association with AMPK or endoplasmic reticulum  
321 (ER) stress [13, 14]. Our present findings demonstrated that the atrial gene expression  
322 of *LC3* was upregulated in the patients with chronic AF. Taking these results together,  
323 we speculate that altered cardiac autophagy in the atrium may be involved in the  
324 progression of AF.

325

## 326 **Implications of the association between the atrial expression** 327 **of FABP3 and autophagy**

328 The intracellular lipid content is generally determined by an imbalance between  
329 the uptake and the utilization of fatty acid, and thus the increased atrial expression of  
330 *FABP3* that we observed might contribute to the accumulation of lipids including DAG  
331 in the atrial myocardium in chronic AF. However, we did not detect an accumulation of  
332 DAG in the atrium in our patients with chronic AF as was reported in another study  
333 [23]. Autophagy has been shown to play a role in the regulation of fatty acid  
334 metabolism via the degradation of excessive intracellular lipids, termed “lipophagy”  
335 [12]. Our findings of an association between the atrial expression of *FABP3* gene and

336 autophagy-related genes in chronic AF patients may support our hypothesis that in  
337 chronic AF, autophagy at least in part contributes to the prevention of the accumulation  
338 of toxic fatty acid metabolites via a degradation of intracellular lipids. Further research  
339 is necessary to clarify the mechanistic roles of cardiac autophagy in the atrium in AF  
340 progression.

341

### 342 **The difference in the atrial expression of FABP3 between** 343 **post-operative AF and chronic AF**

344 We observed that the atrial gene expression of *FABP3* was reduced in patients  
345 with post-operative AF in our prior study [16]; this is inconsistent with our present  
346 results regarding chronic AF patients. One of the possible explanations is a difference in  
347 pathophysiology between post-operative AF and chronic AF. It was demonstrated that  
348 in patients with metabolic syndrome, impairment in the mitochondrial respiratory  
349 capacity in the atrial tissues predicts the occurrence of post-operative AF [24]. In  
350 contrast, the mitochondrial respiratory capacity in the atrium was reported to be  
351 increased in chronic AF patients [25]. Taken together, these findings indicate that  
352 impaired energy metabolism (including reduced fatty acid utilization) in the atrial  
353 muscle might be a primary pathogenesis of post-operative AF, but in chronic AF,

354 excessive fatty acid uptake into the atrial cells seems to play a crucial role in AF  
355 progression.

356

### 357 **Study limitations**

358 Several limitations of this study should be addressed. First, most of the patients  
359 had valvular heart diseases, and the results of this study thus cannot be directly applied  
360 to patients with lone AF. Second, we were unable to perform western blotting to assess  
361 the protein levels of the autophagic marker due to the limited number of specimens.  
362 Therefore, based on our results alone we cannot definitively show whether autophagic  
363 flux is activated in the atrium. Finally, we cannot conclude that there is a causal  
364 relationship between fatty acid metabolism and autophagy in the atrium.

365

366

## 367 **Conclusions**

368           Our study is the first to demonstrate that compared to patients with SR, the atrial  
369 expression of *FABP3* gene was upregulated in association with autophagy-related genes  
370 in patients with chronic AF. We also observed that the atrial gene expression of *FABP3*  
371 was related to structural and electrical remodeling in SR patients. Despite the increased  
372 atrial expression of *FABP3* with higher serum levels of FFA, atrial contents of DAG  
373 were not increased in patients with chronic AF. These findings provide new insights  
374 into the pathophysiology of chronic AF, and they suggest that dysregulated cardiac fatty  
375 acid metabolism might contribute to the progression of AF and induction of autophagy  
376 might have a cardioprotective effect against cardiac lipotoxicity in chronic AF.

377

378

## 379 **Acknowledgements**

380           We thank Haruki Niwano for the technical assistance.

381

## 383 **References**

- 384 1. Benjamin EJ, Wolf PA, D'Agostino RB, Silbershatz H, Kannel WB, Levy D.  
385 Impact of atrial fibrillation on the risk of death: the Framingham Heart Study.  
386 *Circulation*. 1998;98: 946-952.
- 387 2. Schnabel RB, Rienstra M, Sullivan LM, Sun JX, Moser CB, Levy D, et al. Risk  
388 assessment for incident heart failure in individuals with atrial fibrillation. *Eur J Heart*  
389 *Fail*. 2013;15: 843-849.
- 390 3. Wolf PA, Abbott RD, Kannel WB. Atrial fibrillation as an independent risk  
391 factor for stroke: the Framingham Study. *Stroke*. 1991;22: 983-988.
- 392 4. Wolf PA, Mitchell JB, Baker CS, Kannel WB, D'Agostino RB. Impact of atrial  
393 fibrillation on mortality, stroke, and medical costs. *Arch Intern Med*. 1998;158:  
394 229-234.
- 395 5. Karam BS, Chavez-Moreno A, Koh W, Akar JG, Akar FG. Oxidative stress  
396 and inflammation as central mediators of atrial fibrillation in obesity and diabetes.  
397 *Cardiovasc Diabetol*. 2017;16: 120.
- 398 6. Khawaja O, Bartz TM, Ix JH, Heckbert SR, Kizer JR, Zieman SJ, et al. Plasma  
399 free fatty acids and risk of atrial fibrillation (from the Cardiovascular Health Study). *Am*  
400 *J Cardiol*. 2012;110: 212-216.



- 401 7. Lau DH, Nattel S, Kalman JM, Sanders P. Modifiable risk factors and atrial  
402 fibrillation. *Circulation*. 2017;136: 583-596.
- 403 8. Goette A, Honeycutt C, Langberg JJ. Electrical remodeling in atrial fibrillation.  
404 Time course and mechanisms. *Circulation*. 1996;94: 2968-2974.
- 405 9. Casaclang-Verzosa G, Gersh BJ, Tsang TS. Structural and functional  
406 remodeling of the left atrium: clinical and therapeutic implications for atrial fibrillation.  
407 *J Am Coll Cardiol*. 2008;51: 1-11.
- 408 10. Choi JY, Jung JM, Kwon DY, Park MH, Kim JH, Oh K, et al. Free fatty acid  
409 as an outcome predictor of atrial fibrillation-associated stroke. *Ann Neurol*. 2016;79:  
410 317-325.
- 411 11. D'Souza K, Nzirorera C, Kienesberger PC. Lipid metabolism and signaling in  
412 cardiac lipotoxicity. *Biochim Biophys Acta*. 2016;1861: 1513-1524.
- 413 12. Singh R, Kaushik S, Wang Y, Xiang Y, Novak I, Komatsu M, et al. Autophagy  
414 regulates lipid metabolism. *Nature*. 2009;458: 1131-1135.
- 415 13. Yuan Y, Zhao J, Yan S, Wang D, Zhang S, Yun F, et al. Autophagy: a potential  
416 novel mechanistic contributor to atrial fibrillation. *Int J Cardiol*. 2014;172: 492-494.
- 417 14. Wiersma M, Meijering RAM, Qi XY, Zhang D, Liu T, Hoogstra-Berends F, et  
418 al. Endoplasmic reticulum stress is associated with autophagy and cardiomyocyte

- 419 remodeling in experimental and human atrial fibrillation. *J Am Heart Assoc.* 2017;6:  
420 e006458.
- 421 15. Garcia L, Verdejo HE, Kuzmicic J, Zalaquett R, Gonzalez S, Lavandero S, et  
422 al. Impaired cardiac autophagy in patients developing postoperative atrial fibrillation. *J*  
423 *Thorac Cardiovasc Surg.* 2012;143: 451-459.
- 424 16. Shingu Y, Yokota T, Takada S, Niwano H, Ooka T, Katoh H, et al. Decreased  
425 gene expression of fatty acid binding protein 3 in the atrium of patients with new onset  
426 of atrial fibrillation in cardiac perioperative phase. *J Cardiol.* 2018;71: 65-70.
- 427 17. Xu ZX, Zhong JQ, Zhang W, Yue X, Rong B, Zhu Q, et al. Atrial conduction  
428 delay predicts atrial fibrillation in paroxysmal supraventricular tachycardia patients after  
429 radiofrequency catheter ablation. *Ultrasound Med Biol.* 2014;40: 1133-1137.
- 430 18. Zoghbi WA, Enriquez-Sarano M, Foster E, Grayburn PA, Kraft CD, Levine  
431 RA, et al. Recommendations for evaluation of the severity of native valvular  
432 regurgitation with two-dimensional and Doppler echocardiography. *J Am Soc*  
433 *Echocardiogr.* 2003;16: 777-802.
- 434 19. Takada S, Masaki Y, Kinugawa S, Matsumoto J, Furihata T, Mizushima W, et  
435 al. Dipeptidyl peptidase-4 inhibitor improved exercise capacity and mitochondrial  
436 biogenesis in mice with heart failure via activation of glucagon-like peptide-1 receptor  
437 signalling. *Cardiovasc Res.* 2016;111: 338-347.

- 438 20. Yamamoto T, Yamamoto A, Watanabe M, Matsuo T, Yamazaki N, Kataoka  
439 M, et al. Classification of FABP isoforms and tissues based on quantitative evaluation  
440 of transcript levels of these isoforms in various rat tissues. *Biotechnol Lett.* 2009;31:  
441 1695-1701.
- 442 21. Ari H, Ari S, Akkaya M, Aydin C, Emlek N, Sarigul OY, et al. Predictive  
443 value of atrial electromechanical delay for atrial fibrillation recurrence. *Cardiol J.*  
444 2013;20: 639-647.
- 445 22. Boldt A, Wetzel U, Lauschke J, Weigl J, Gummert J, Hindricks G, et al.  
446 Fibrosis in left atrial tissue of patients with atrial fibrillation with and without  
447 underlying mitral valve disease. *Heart.* 2004;90: 400-405.
- 448 23. Gizurarson S, Stahlman M, Jeppsson A, Shao Y, Redfors B, Bergfeldt L, et al.  
449 Atrial fibrillation in patients admitted to coronary care units in western Sweden - focus  
450 on obesity and lipotoxicity. *J Electrocardiol.* 2015;48: 853-860.
- 451 24. Montaigne D, Marechal X, Lefebvre P, Modine T, Fayad G, Dehondt H, et al.  
452 Mitochondrial dysfunction as an arrhythmogenic substrate: a translational  
453 proof-of-concept study in patients with metabolic syndrome in whom post-operative  
454 atrial fibrillation develops. *J Am Coll Cardiol.* 2013;62: 1466-1473.

- 455 25. Slagsvold KH, Johnsen AB, Rognmo O, Hoydal MA, Wisloff U, Wahba A.  
456 Mitochondrial respiration and microRNA expression in right and left atrium of patients  
457 with atrial fibrillation. *Physiol Genomics*. 2014;46: 505-511.  
458  
459  
460

## 461 **Figure legends**

### 462 **Fig 1: Preoperative levels of serum FFA.**

463 Lines indicate the median with the interquartile range (IQR) in each group (SR, n=35;

464 AF, n=12). AF, atrial fibrillation; FFA, free fatty acids; SR, sinus rhythm.

465

### 466 **Fig 2: Gene expression related to fatty acid metabolism in the right atrial**

467 **myocardium.**

468 (A) *CD36*, (B) *FABP3*, and (C) *CPT1B*. Lines indicate the median with IQR in each

469 group (SR; n=38, AF; n=13). *CD36*, cluster of differentiation 36 (fatty acid translocase);

470 *CPT1B*, carnitine palmitoyltransferase 1B; *FABP3*, fatty acid binding protein 3.

471

### 472 **Fig 3: Association between gene expression levels of *FABP3* in the right atrial**

473 **myocardium and parameters of atrial remodelling in patients with SR.**

474 (A) *FABP3* and RA diameter (n=38) and (B) *FABP3* and intra-atrial EMD (n=37).

475 EMD, electromechanical delay; *FABP3*, fatty acid binding protein 3; RA, right atrium.

476

### 477 **Fig 4: Enzymatic activities related to the mitochondrial TCA cycle and fatty acid**

478  **$\beta$ -oxidation in the right atrial myocardium.**

479 (A) CS activity and (B)  $\beta$ -HAD activity. Lines indicate the median with IQR in each  
480 group (SR, n=20; AF, n=8).  $\beta$ -HAD,  $\beta$ -hydroxyacyl CoA dehydrogenase; CS, citrate  
481 synthase.

482

483 **Fig 5: DAG contents in the right atrial myocardium.**

484 Lines indicate the median with IQR in each group (SR, n=6; AF, n=6). DAG,  
485 diacylglycerol; RFUs, relative fluorescence units.

486

487 **Fig 6: Gene expression related to autophagy in the right atrial myocardium.**

488 (A) *ATG5*, (B) *ULK1*, (C) *BCLN1*, and (D) *LC3*. Lines indicate the median with IQR in  
489 each group (SR, n=37 except for *ATG5* [n=38]; AF, n=13). *ATG5*, autophagy-related  
490 gene 5; *BCLN1*, beclin-1; *LC3*, microtubule-associated protein light chain 3; *ULK1*,  
491 Unc-51-like kinase 1.

492

493 **Fig 7: Association between the expression levels of *FABP3* gene and  
494 autophagy-related genes in the right atrial myocardium in patients with SR or AF.**

495 (A) *FABP3* and *ATG5* (SR; n=13; AF, n=38), (B) *FABP3* and *ULK1* (SR, n=13; AF,  
496 n=37), (C) *FABP3* and *BCLN1* (SR, n=13; AF, n=37), and (D) *FABP3* and *LC3* (SR,

497 n=13; AF, n=37). *FABP3*, fatty acid binding protein 3. Other abbreviations are

498 explained in the Fig 6 legend.

499

**Table 1. Characteristics of the SR and AF patients**

|                                 | SR<br>(n=38) | AF<br>(n=13) | p-value |
|---------------------------------|--------------|--------------|---------|
| Age, yrs                        | 70 ± 13      | 69 ± 9       | 0.775   |
| Male                            | 18 (47%)     | 8 (62%)      | 0.378   |
| BMI, kg/m <sup>2</sup>          | 22.8 ± 3.4   | 24.8 ± 4.3   | 0.097   |
| Heart rate, bpm                 | 67 ± 10      | 73 ± 13      | 0.134   |
| Systolic blood pressure, mm Hg  | 118 ± 19     | 115 ± 18     | 0.643   |
| Diastolic blood pressure, mm Hg | 60 ± 12      | 68 ± 13      | 0.051   |
| Diabetes mellitus               | 7 (18%)      | 2 (15%)      | 0.804   |
| Coronary artery disease         | 13 (34%)     | 2 (15%)      | 0.198   |
| Medications                     |              |              |         |
| Diuretics                       | 18 (47%)     | 13 (100%)    | 0.001   |
| β-blockers                      | 14 (37%)     | 9 (69%)      | 0.043   |
| Statins                         | 18 (47%)     | 4 (31%)      | 0.297   |
| Total cholesterol, mmol/L       | 4.7 ± 0.9    | 4.4 ± 0.7    | 0.357   |
| Triglycerides, mmol/L           | 1.4 ± 0.7    | 1.0 ± 0.5    | 0.052   |
| Fasting blood glucose, mmol/L   | 5.5 (0.8)    | 5.7 (0.7)    | 0.802   |
| Insulin, μU/mL                  | 5.0 (4.0)    | 5.8 (8.9)    | 0.612   |
| HbA1c, %                        | 5.7 ± 0.8    | 5.9 ± 0.6    | 0.324   |
| BNP, pg/mL                      | 79 (270)     | 249 (321)    | 0.060   |

Data are mean±SD, median (interquartile range), or n (%). AF, atrial fibrillation; BMI, body mass index; BNP, B-type natriuretic peptide; HbA1c, hemoglobin A1c; SR, sinus rhythm.

500

501



**Table 2. Echocardiographic parameters of the SR and AF patients**

|                           | SR<br>(n=38) | AF<br>(n=13) | p-value |
|---------------------------|--------------|--------------|---------|
| LVDd, mm                  | 48 (20)      | 59 (17)      | 0.209   |
| LVDs, mm                  | 31 (22)      | 41 (20)      | 0.132   |
| LVEF, %                   | 59 ± 14      | 54 ± 14      | 0.268   |
| Left atrial diameter, mm  | 41 ± 7       | 53 ± 9       | <0.001  |
| Right atrial diameter, mm | 34 ± 6       | 42 ± 9       | 0.007   |
| Aortic stenosis:          |              |              | 0.130   |
| Mild                      | 1 (3%)       | 0 (0%)       |         |
| Moderate                  | 1 (3%)       | 1 (8%)       |         |
| Severe                    | 15 (39%)     | 1 (8%)       |         |
| Aortic regurgitation:     |              |              | 0.306   |
| Mild                      | 18 (47%)     | 4 (31%)      |         |
| Moderate                  | 4 (11%)      | 2 (15%)      |         |
| Severe                    | 10 (26%)     | 2 (15%)      |         |
| Mitral regurgitation:     |              |              | 0.002   |
| Mild                      | 29 (76%)     | 5 (38%)      |         |
| Moderate                  | 2 (5%)       | 5 (38%)      |         |
| Severe                    | 2 (5%)       | 3 (23%)      |         |
| Tricuspid regurgitation:  |              |              | 0.133   |
| Mild                      | 26 (68%)     | 6 (46%)      |         |
| Moderate                  | 3 (78%)      | 3 (23%)      |         |
| Severe                    | 0 (0%)       | 1 (8%)       |         |

Data are mean±SD, median (interquartile range), or n (%). AF, atrial fibrillation; LVDd, left ventricular end-diastolic diameter; LVDs, left ventricular end-systolic diameter; LVEF, left ventricular ejection fraction; SR, sinus rhythm.

Figure 1

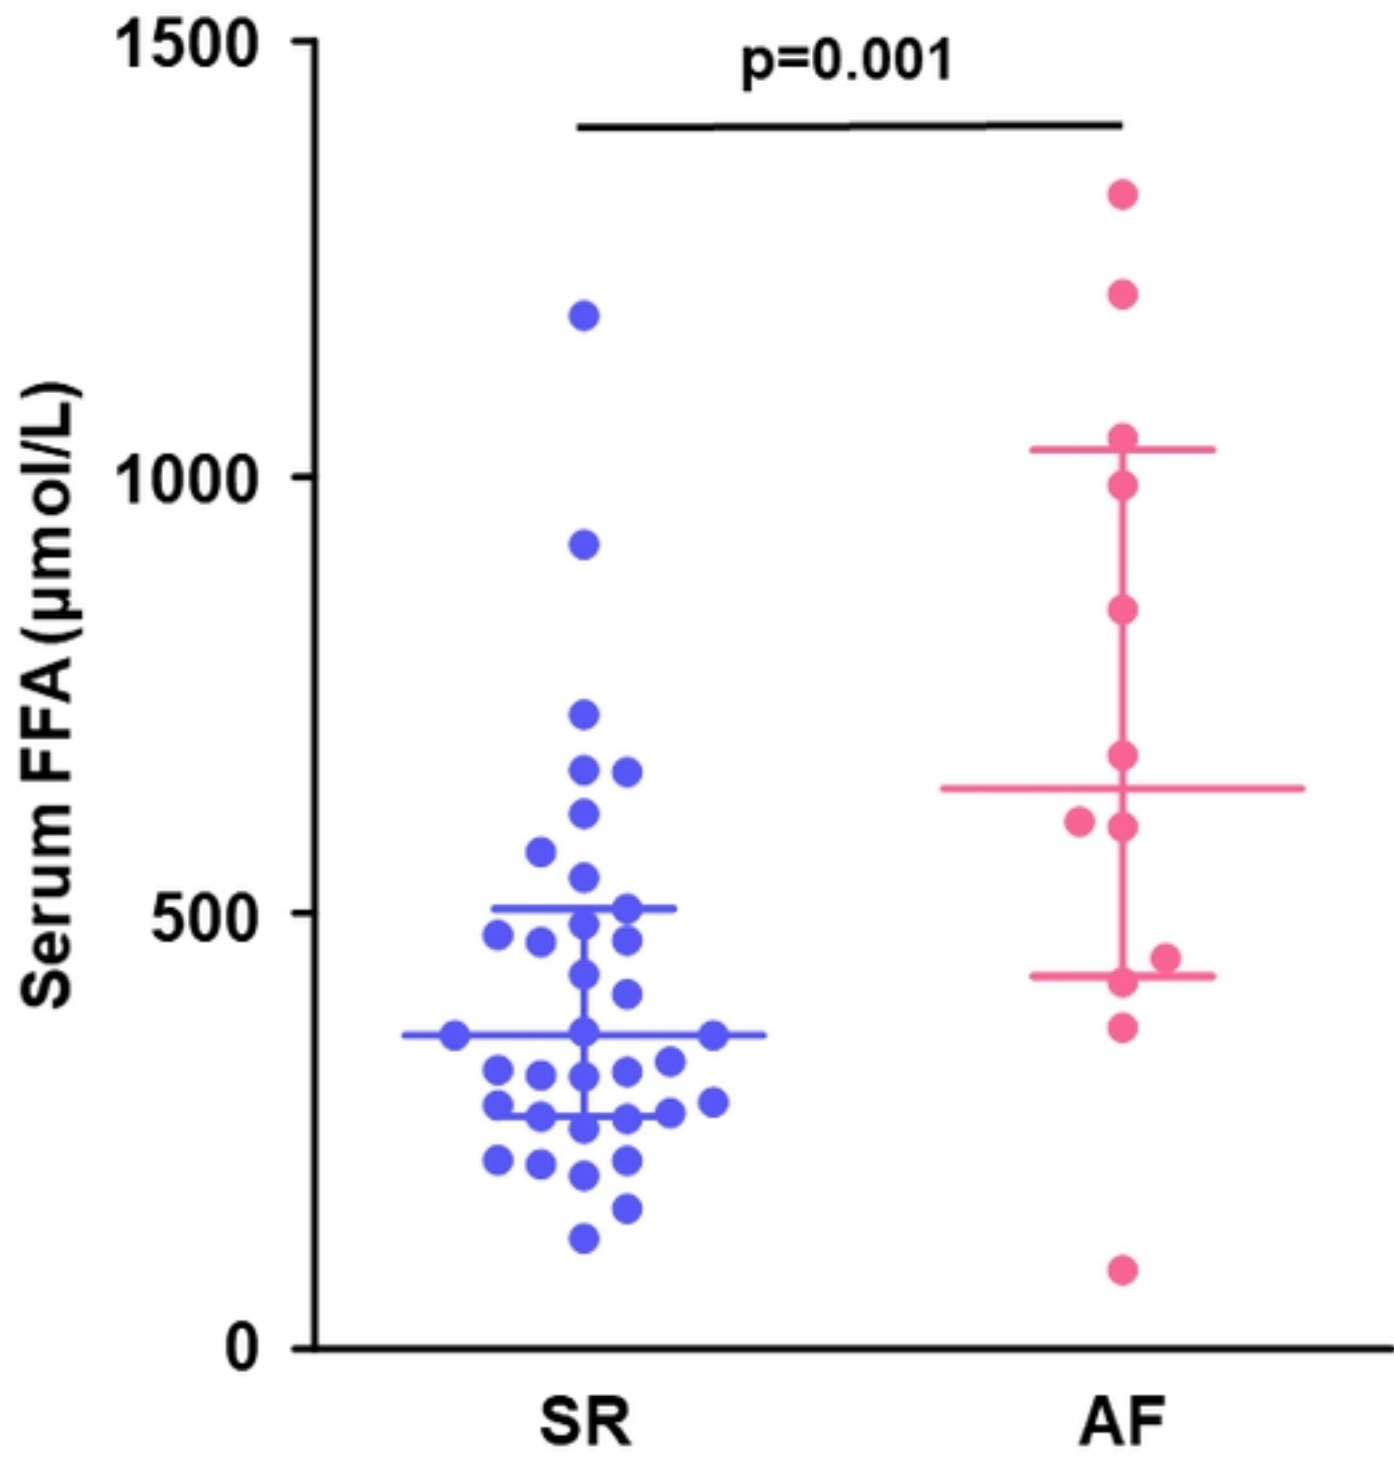

Figure 1

**Figure 2**

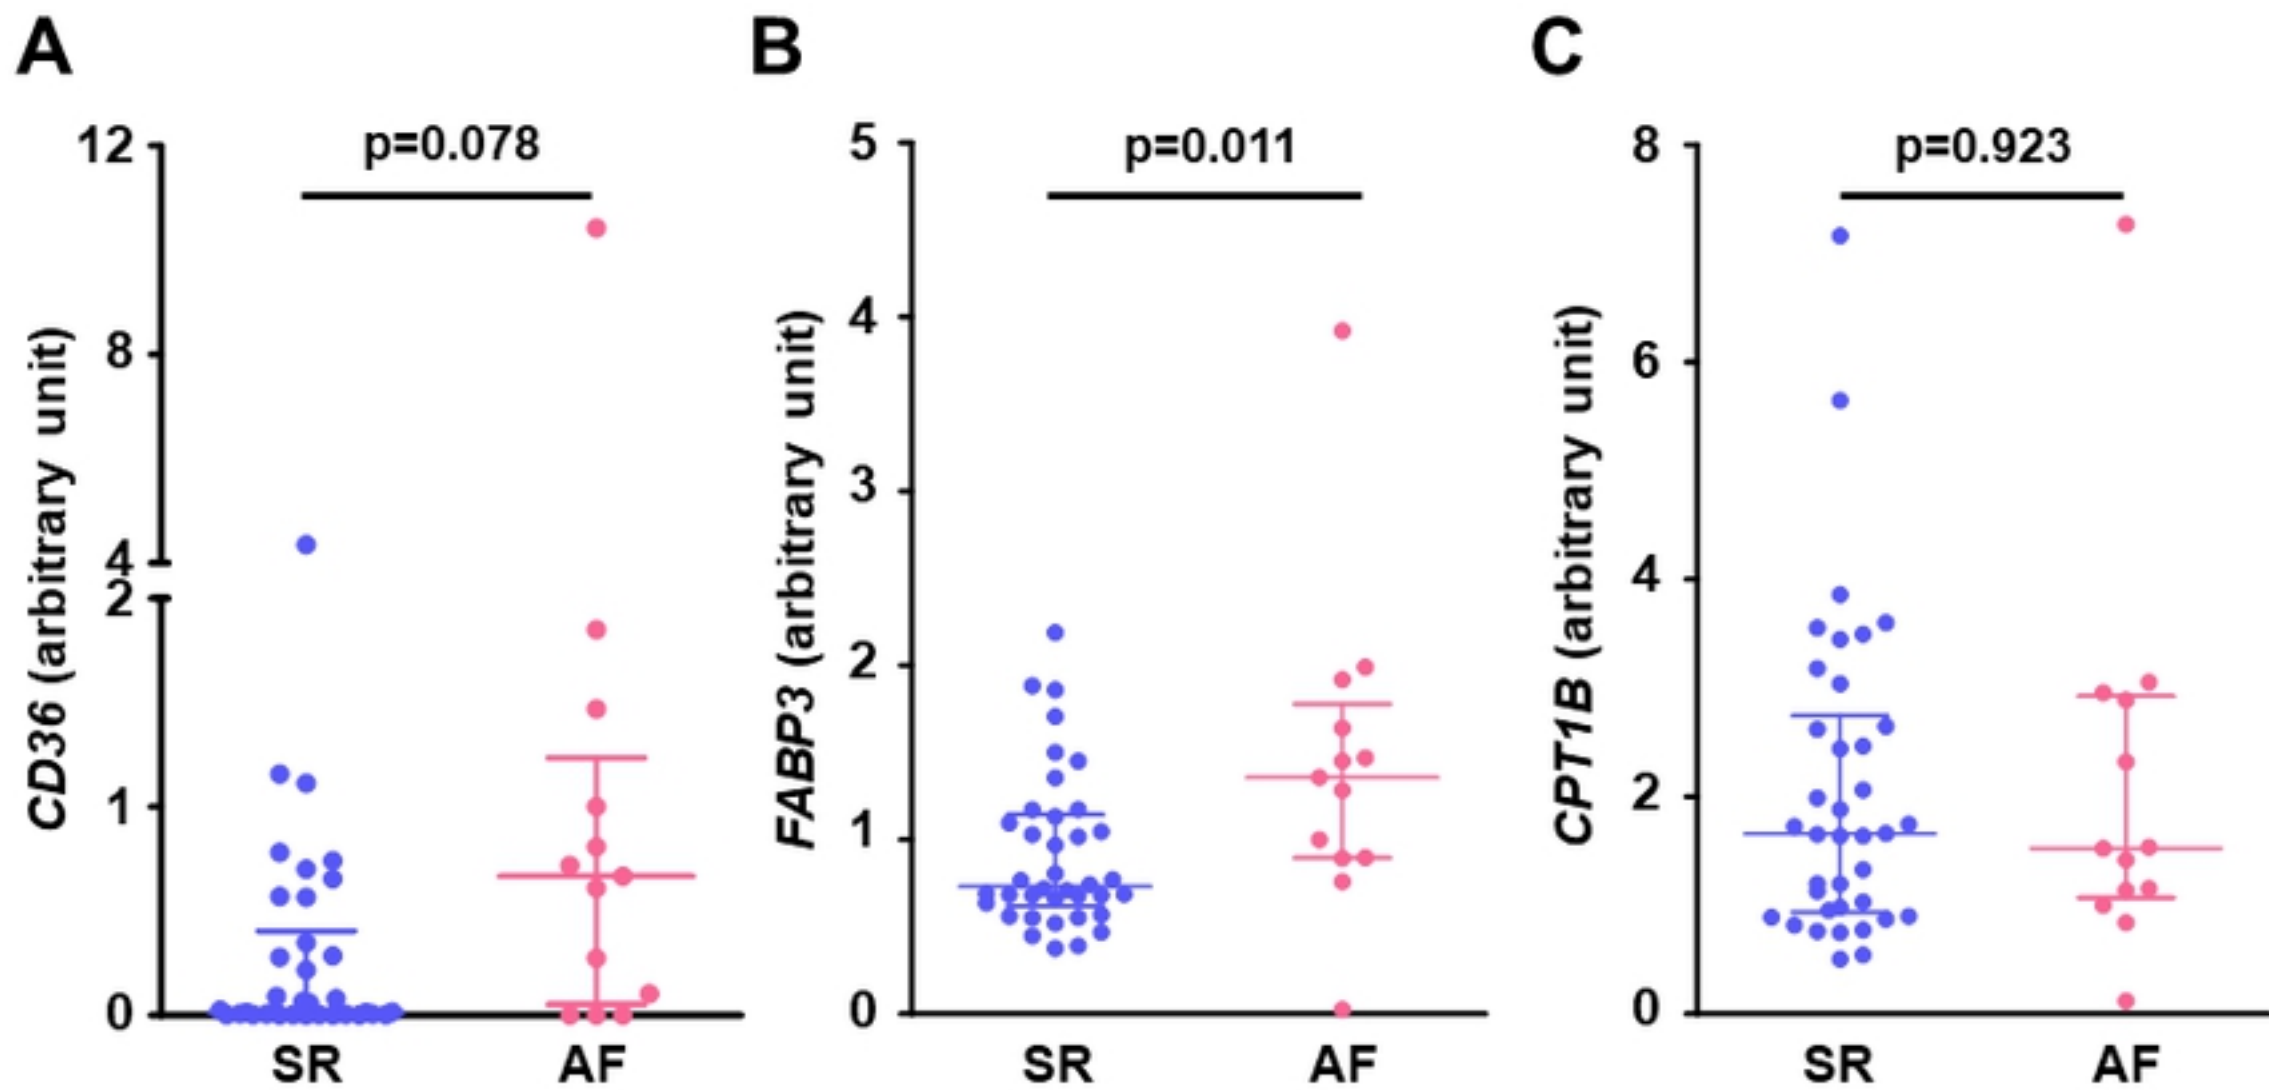

Figure 2

**Figure 3**

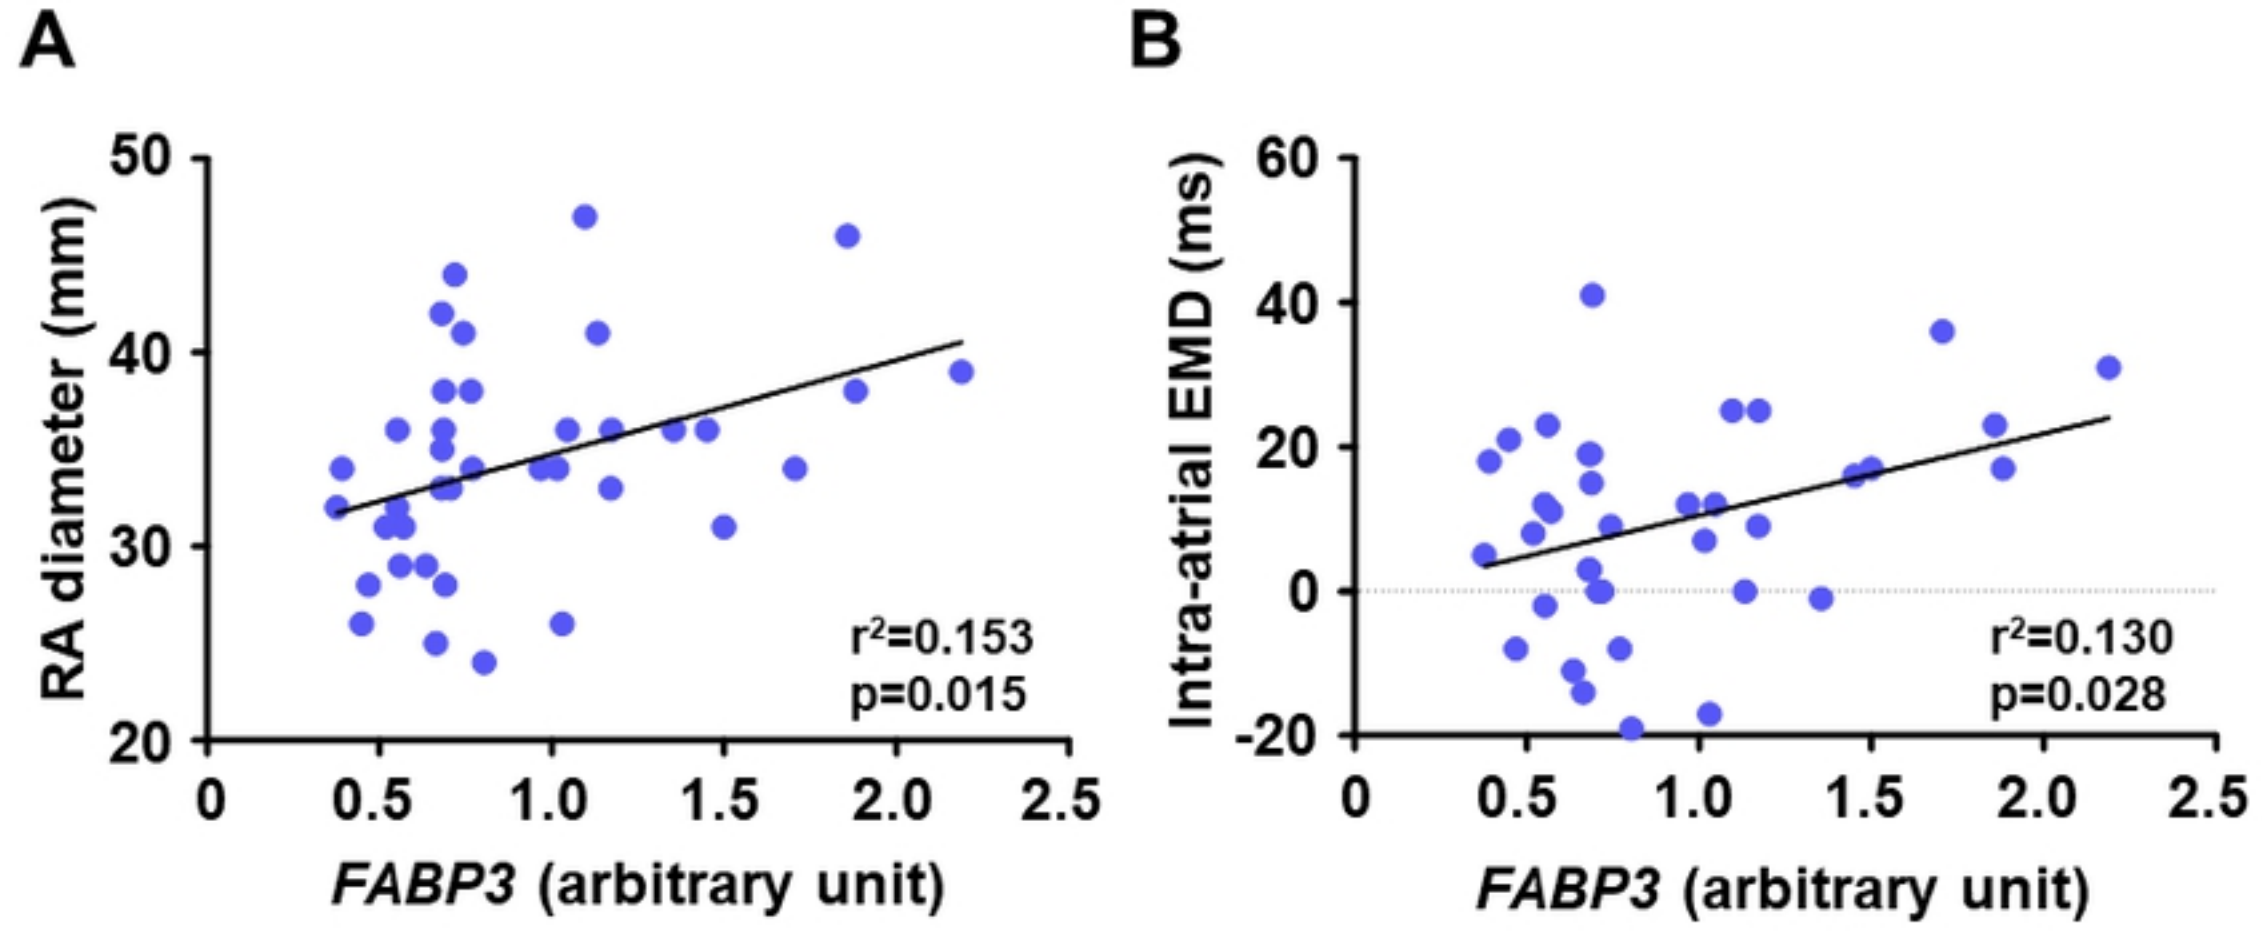

Figure 3

**Figure 4**

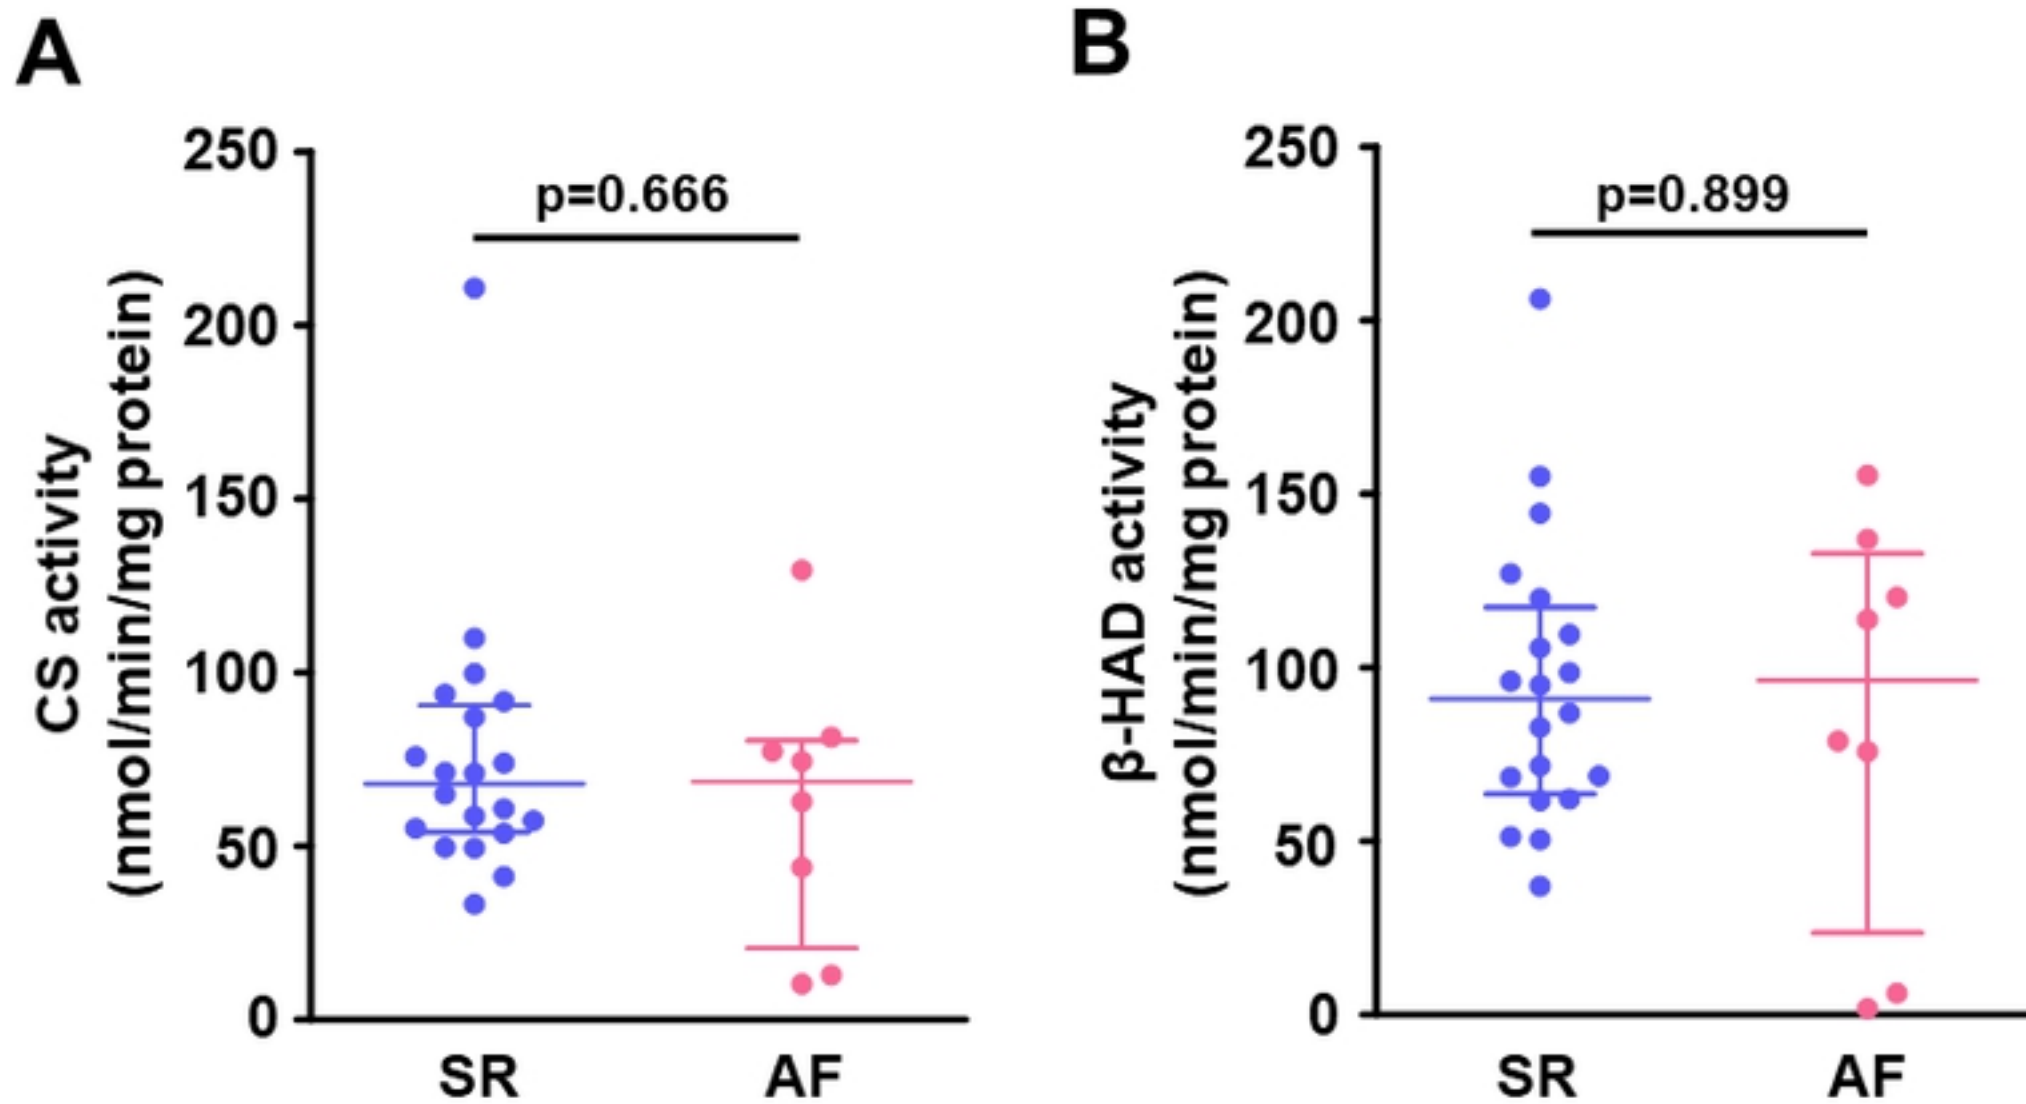

Figure 4



# Figure 7

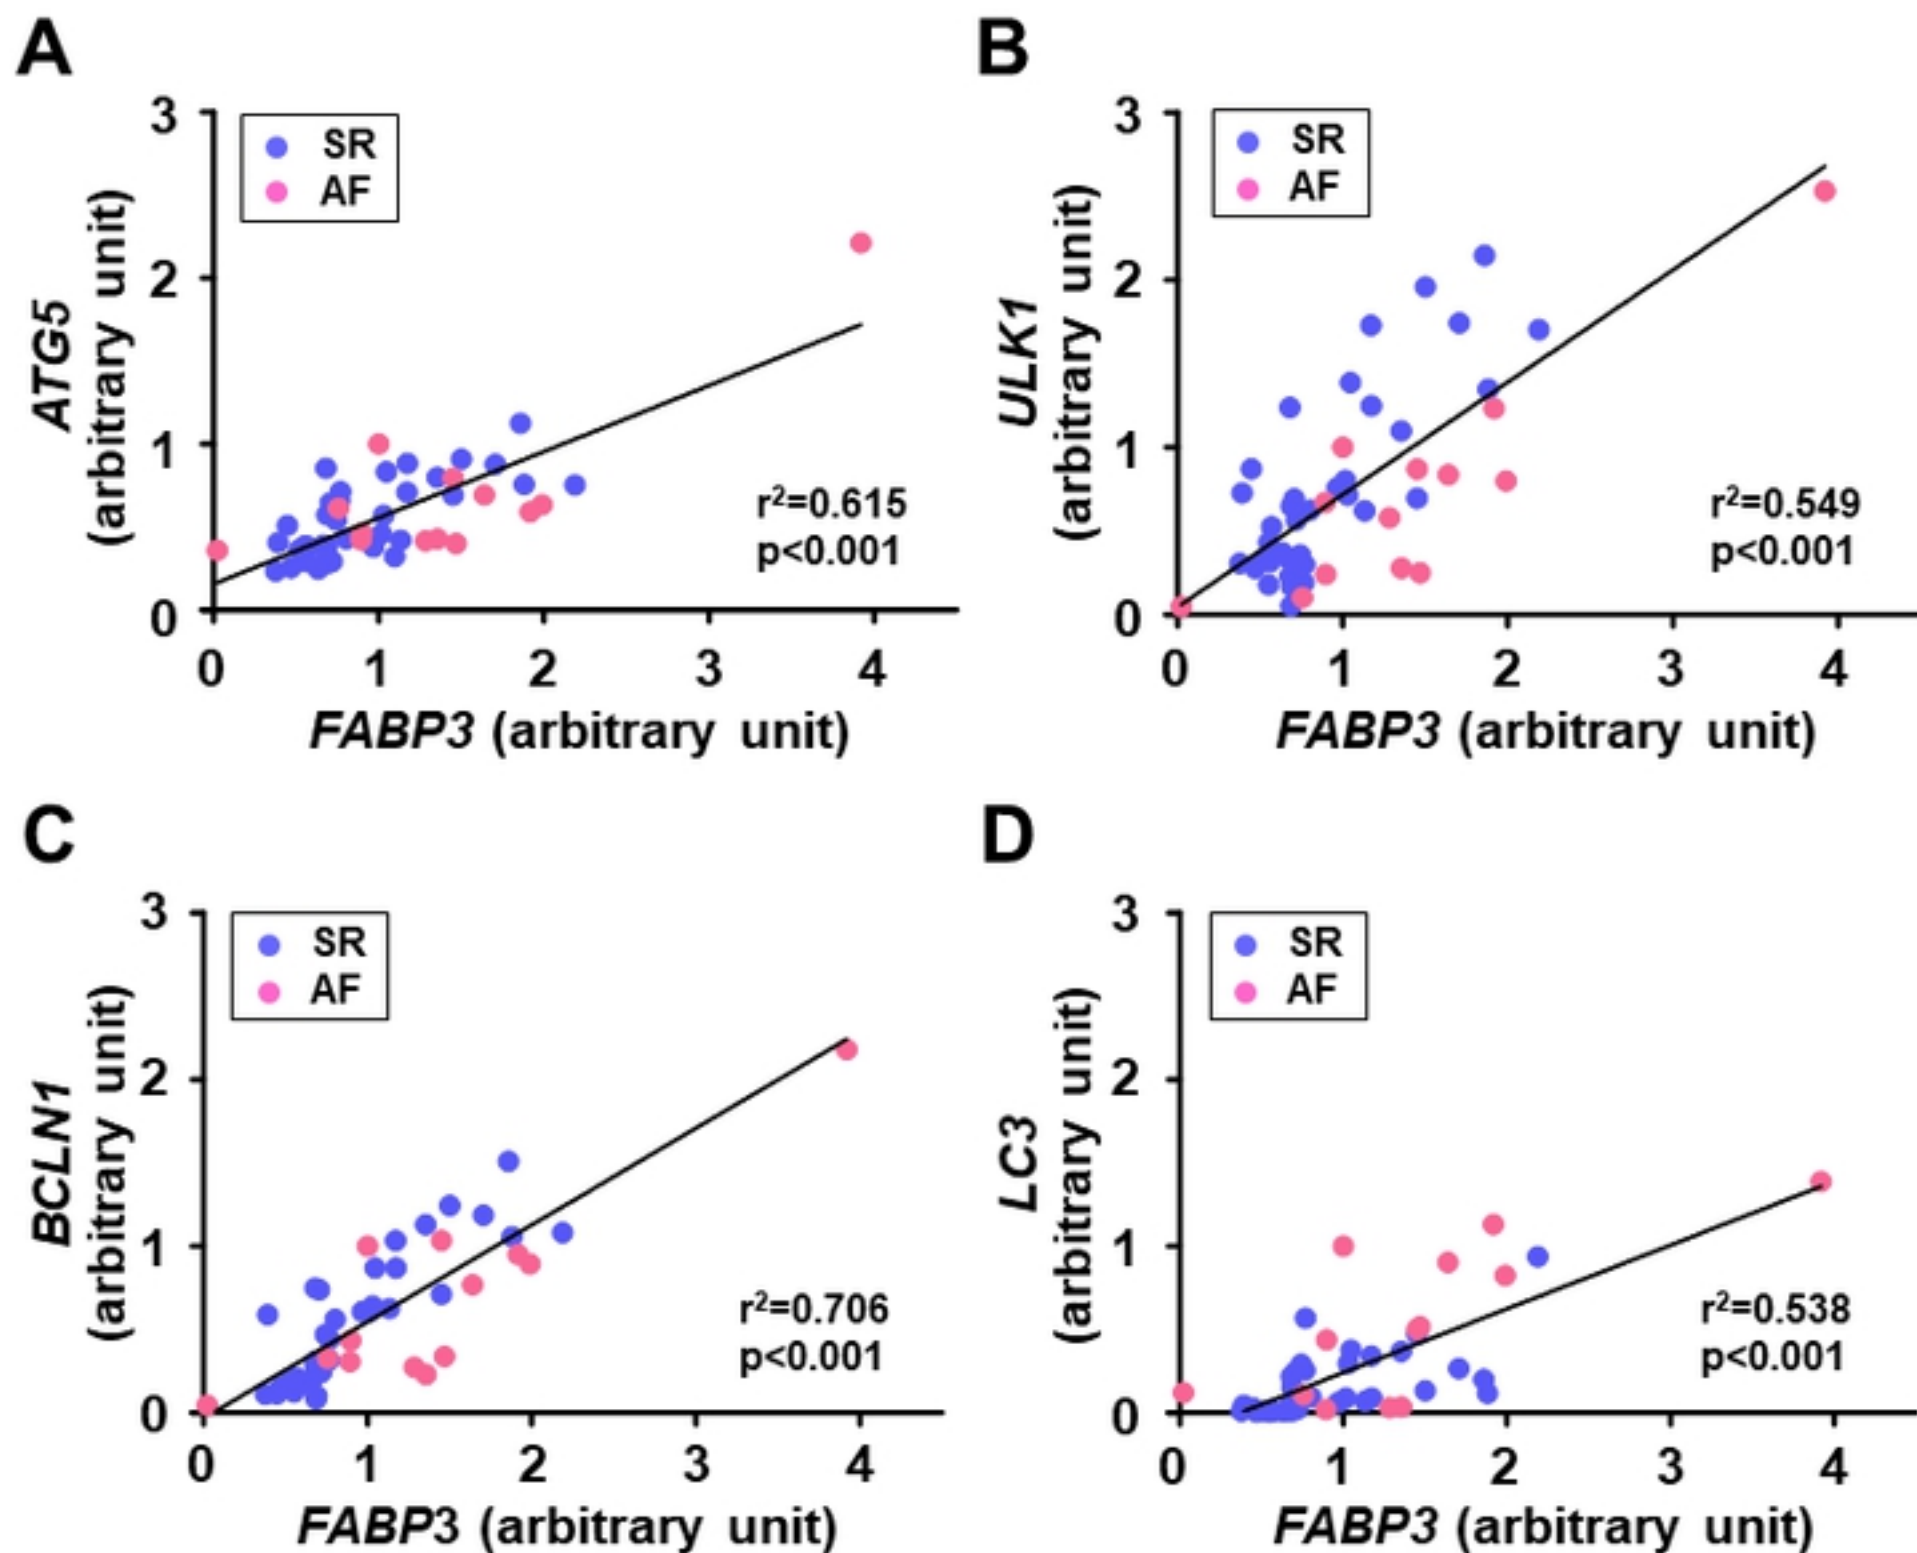

# Figure 7

Figure 5

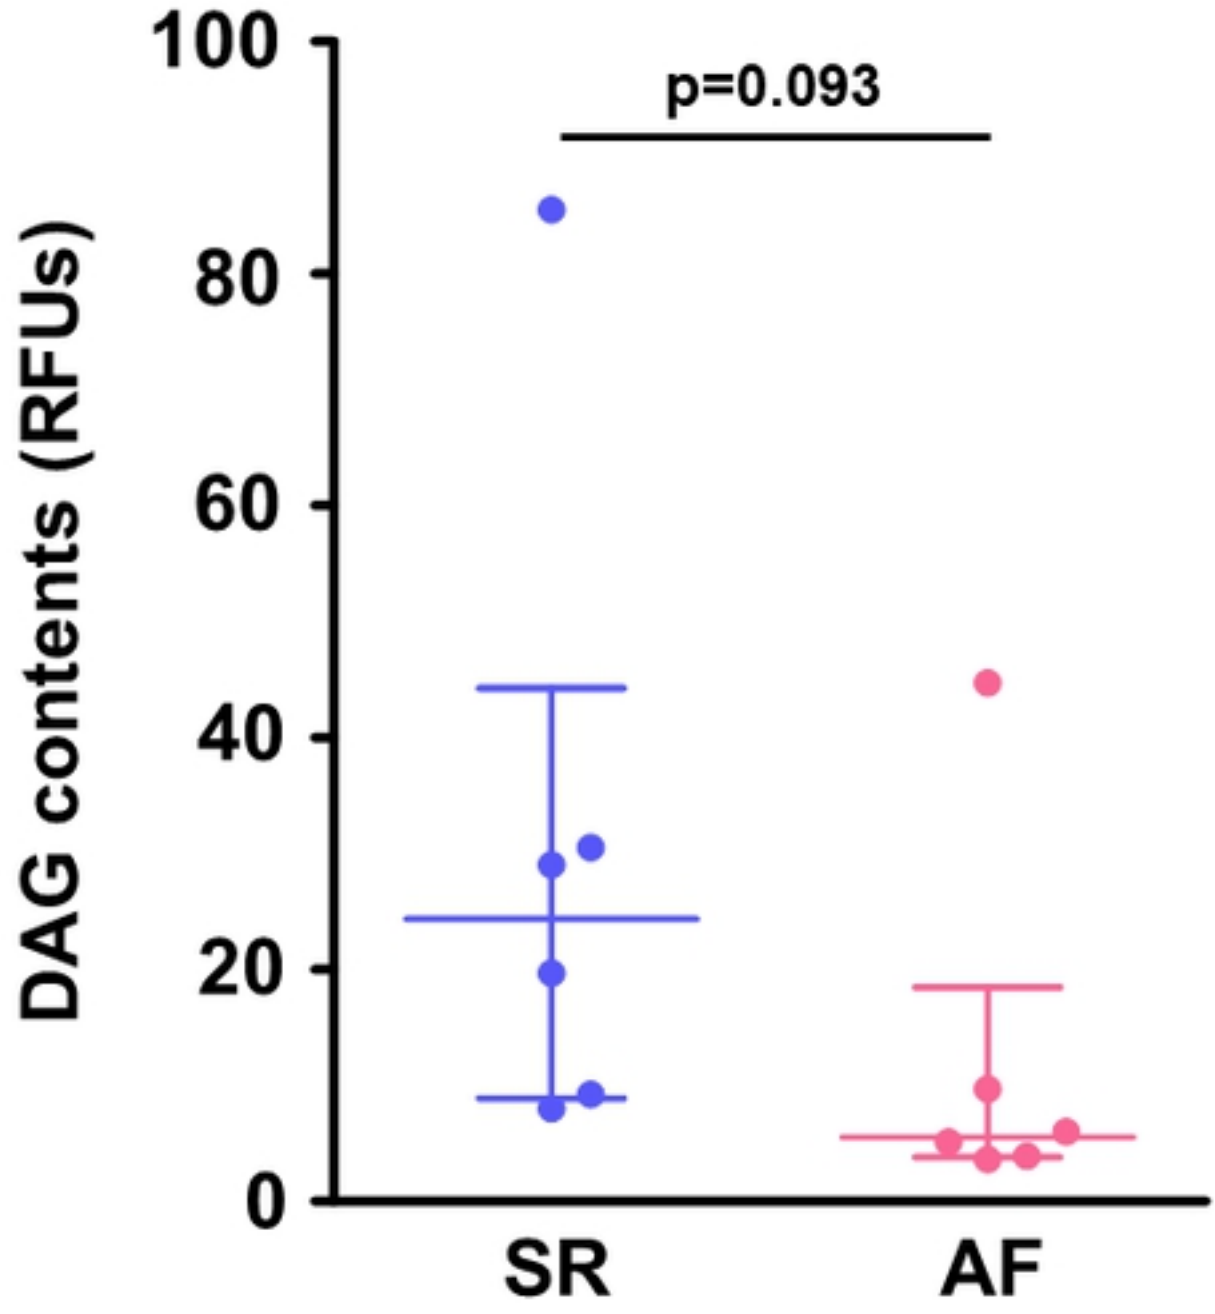

Figure 5
